# Supplementary material for: Social egg freezing among Single Women in China: Policy Perceptions, Attitudes, and Influencing Factors
Source: Research Square preprint supplement (doi:10.21203/rs.3.rs-7388275/v1), 2025-09-22
Supplement: Supplementary file 1 [file cf7bb8762d6397ed5d8d47b4.docx]

Questionnaire on Egg Freezing for Single Women

I. Basic Information (7 questions)

1. Which city do you live in? (Single choice) [Single-choice question] *

A. First-tier cities (Beijing, Shanghai, Guangzhou, Shenzhen)

B. Emerging first-tier cities (Hangzhou, Chongqing, Nanjing, etc.)

C. Second-tier cities (Changsha, Qingdao, Shenyang, etc.)

D. Other (please specify) _________________ *

2. What is your gender? (Single choice) [Single-choice question] *

A. Male

B. Female

C. Prefer not to disclose

3. How old are you? (Single choice) [Single-choice question] *

A. 18-22 years old (college students)

B. 23-28 years old (new to workplace/on the rise)

C. 29-35 years old (facing career and childbearing choices)

D. 36-45 years old (with social experience/partially having children)

E. 46-55 years old (concerned about children/social fertility issues)

F. Over 55 years old (perception of traditional concepts and new things)

4. What is your marital status? (Single choice) [Single-choice question] *

A. Unmarried (never married)

B. Married (with children)

C. Married (without children)

D. Divorced (single)

E. Widowed (single)

G. Other (please specify) _________________ *

5. What is your occupation? (Single choice) [Single-choice question] *

A. College student (non-medical major)

B. College student (medical major)

C. Ordinary enterprise employee (manufacturing/service/internet, etc.)

D. Enterprise manager (grassroots/middle/top management)

E. Civil servant (central/local government agencies)

F. Medical practitioner (doctor/nurse/pharmacist, etc.)

G. Educator (primary/middle/high school/university teacher)

H. Legal practitioner (lawyer/judge/researcher, etc.)

I. Freelancer (we-media/individual/part-time, etc.)

J. Retiree

K. Emerging occupation (artificial intelligence/e-commerce, etc.)

L. Other (please specify) _________________ *

6. What is your education level? (Single choice) [Single-choice question] *

A. Primary school or below

B. Junior high school

C. Senior high school/technical secondary school

D. Junior college

E. Bachelor's degree

F. Master's degree

G. Doctoral degree

7. What is your annual income level? (Single choice) [Single-choice question] *

A. Below 50,000 yuan

B. 50,000-80,000 yuan

C. 80,000-120,000 yuan

D. 120,000-150,000 yuan

E. 150,000-200,000 yuan

F. 200,000-250,000 yuan

G. 250,000-300,000 yuan

H. Above 300,000 yuan

I. Prefer not to disclose

II. Policy Perception and Attitude (10 questions)

1. Do you think egg freezing can reduce the pressure on single women to find a partner in a short time? [Single-choice question] *

A. Yes, it can significantly reduce the pressure

B. Yes, but the effect is limited

C. No, it cannot reduce the pressure

D. Not sure

2. Have you considered egg freezing? (Single choice) [Single-choice question] *

A. Yes (I am female)

B. No (I am female)

C. Not sure (I am female)

D. I am male

3. Do you understand China's current egg freezing policy? (Single choice) [Single-choice question] *

A. Very well-informed

B. Basically informed

C. Heard of it, but unclear about details

D. Not sure

4. Do you think egg freezing for single women is their legal reproductive right? (Single choice) [Single-choice question] *

A. Yes, single women should have the right to egg freezing unconditionally

B. Yes, but it needs to meet specific conditions (such as age, health)

C. No, egg freezing should be limited to married couples

D. Not sure

5. What are your main concerns about the safety of egg freezing technology? [Multiple-choice question] *

A. Surgical health risks (such as ovarian hyperstimulation)

B. Success rate of freezing and thawing

C. Potential impact of long-term freezing on egg quality

D. Health risks to offspring

E. Other _________________ *

6. What risks do you think may exist once egg freezing for single women is legalized? [Multiple-choice question] *

A. Over-marketing by commercial institutions and abuse of egg freezing technology

B. Women delaying childbearing, increasing the risk of pregnancy complications

C. Triggering underground egg trading

D. Weakening men's responsibilities in the family

E. Other (please specify) _________________ *

7. What do you think is the main social value of egg freezing technology? [Multiple-choice question] *

A. Safeguarding women's reproductive autonomy

B. Alleviating the conflict between career and childbearing

C. Promoting gender equality

D. Facilitating reproduction in non-traditional families

E. Other (please specify) _________________ *

8. Who do you think egg freezing technology should prioritize serving? (Single choice) [Single-choice question] *

A. Single women (regardless of marital or childbearing status)

B. Married infertile couples

C. Groups with medical needs (such as cancer patients)

D. No priority, open equally

9. What is your psychological tolerance range for egg freezing costs? (Single choice) [Single-choice question] *

A. Below 50,000 yuan

B. 50,000-100,000 yuan

C. 100,000-150,000 yuan

D. Above 150,000 yuan

10. Who do you think should reasonably share the costs of egg freezing technology? [Multiple-choice question] *

A. Individual bears the full cost

B. Government financial subsidies (such as fertility welfare funds)

C. Medical insurance coverage

D. Enterprise employers (as employee benefits)

E. Third-party public welfare fund subsidies

F. Other (please specify) _________________ *

III. Policy Implementation and Supervision (6 questions)

1. Do you support revising regulations to allow single women to freeze their eggs? (Single choice) [Single-choice question] *

A. Fully support (reasonable demand)

B. Support (needs to be carried out standardizedly)

C. Neutral (depends on implementation)

D. Not support (worried about problems)

E. Fully oppose (violates legal ethics)

F. Not sure

2. What groups' interests do you think should be prioritized in revising egg freezing policies? [Multiple-choice question] *

A. Professional women (balancing the conflict between career and childbearing time)

B. Elderly single women (need for fertility preservation)

C. LGBT groups (support for non-traditional family structures)

D. Egg donors (bioethics and economic compensation)

E. Medical necessity (such as diseases affecting fertility)

F. Policy fairness (coordination of urban-rural/income/regional differences)

3. What do you think is the best supervision model for egg freezing technology? (Single choice) [Single-choice question] *

A. Government-led strict approval

B. Self-regulation by industry associations

C. Independent standardization by medical institutions

D. Supervision by third-party institutions

4. What impact will the legalization of egg freezing for single women have on the labor market? [Multiple-choice question] *

A. Increase female labor participation rate (egg freezing reduces concerns about career interruption due to childbearing, encouraging more women to enter or stay in the labor market)

B. Increase the supply of highly skilled female talents (highly educated and skilled women can better balance career and family through egg freezing)

C. Intensify competition in the labor market (more women entering the labor market may increase competition in certain industries and positions)

D. Promote reform of corporate welfare policies (enterprises will include egg freezing costs in employee benefits to attract and retain outstanding female talents)

E. Limited impact on the labor market (not all women will choose egg freezing)

5. Will egg freezing promote late marriage and late childbearing? (Single choice) [Single-choice question] *

A. Fully agree

B. Basically agree

C. Neutral

D. Basically not

E. Fully not

F. Not sure

6. What impact will egg freezing have on the population structure? [Multiple-choice question] *

A. Women may postpone their childbearing age after choosing egg freezing, leading to a short-term decrease in the number of newborns

B. The proportion of elderly mothers increases, the natural population replacement rate slows down, and the aging problem may accelerate

C. If egg freezing is combined with gender selection technology, it may cause gender imbalance

D. The proportion of single women giving birth through egg freezing increases, promoting the growth of single-parent families or non-traditional family models

E. Other (please specify) _________________ *

## IV. Social Impact and Suggestions (7 questions)

1. What concerns do you have about egg freezing for single women? [Multiple-choice question] *

A. Abuse of technology and insufficient supervision (such as profit-making by commercial institutions, risk of underground transactions)

B. Excessive economic burden (difficult to afford egg freezing and subsequent childbearing costs)

C. Ethical disputes (such as egg ownership,复杂化 of family structure)

D. Imperfect legal system (lack of clear definition of disposal rights and commercial transactions)

E. Health risks (ovarian hyperstimulation, questionable safety of egg freezing technology)

F. Uneven distribution of social resources (high-income groups enjoy the technology first)

G. Other (please specify) _________________ *

2. What aspects do you think need to be strengthened in supervision after egg freezing is legalized? [Multiple-choice question] *

A. Abuse of technology (such as gender selection)

B. Qualification review of medical institutions

C. Transparency of egg freezing costs

D. Compliance of egg disposal procedures

E. Other (please specify) _________________ *

3. What positive changes do you think legalizing egg freezing may bring? (Multiple choices) [Multiple-choice question] *

A. Safeguard women's reproductive autonomy (break the restriction of marriage framework, independently decide the time of childbearing)

B. Alleviate the conflict between career and childbearing (women can balance career development and childbearing plans)

C. Promote the progress of assisted reproductive technology (market demand stimulates technological research and clinical standardization)

D. Promote reproductive diversification (support non-traditional family reproduction such as single women and homosexual groups)

E. Optimize the age structure of the population (extend the childbearing window, alleviate the pressure of aging)

F. Promote the renewal of social concepts (enhance inclusiveness of unmarried childbearing and technology-assisted childbearing)

G. Other (please specify) _________________ *

4. Do you think the popularization of egg freezing technology will increase or decrease the dependence on assisted reproductive technologies such as IVF? (Single choice) [Single-choice question] *

A. Increase, more women will choose IVF after egg freezing

B. Decrease, egg freezing itself provides more reproductive choices

C. No significant impact, the two have different needs

D. Not sure

5. What payment models do you think can be considered if egg freezing technology is included in medical insurance? [Multiple-choice question] *

A. Full reimbursement (zero personal payment)

B. Proportional reimbursement (such as 70% paid by medical insurance pooling)

C. Quota reimbursement (setting an annual maximum payment limit)

D. Special subsidies for professional groups (such as female employees' fertility benefits)

E. Regional differentiated policies (classified by urban development level)

F. Other (please specify the specific plan) _________________ *

6. What do you think of the phenomenon of single women having children through egg freezing technology? (Single choice) [Single-choice question] *

A. Support, it is a manifestation of women's reproductive autonomy

B. Neutral, but need to pay attention to the growth environment of children

C. Worried, may cause complication of family structure

D. Oppose, violates traditional family concepts

E. Other (please specify) _________________ *

7. What specific suggestions do you have for improving egg freezing policies? [Multiple-choice question] *

A. Establish a unified national technical standard

B. Set up an ethics review committee

C. Implement tiered pricing for egg freezing services

D. Strengthen public science popularization and publicity

E. Other (please specify) _________________ *
